# Supplementary material
Source: Springer Nature journal article supplement (https://www.springermedizin.de/resource/supplementary/13024_2010_150_MOESM2_ESM.pdf/9643486)

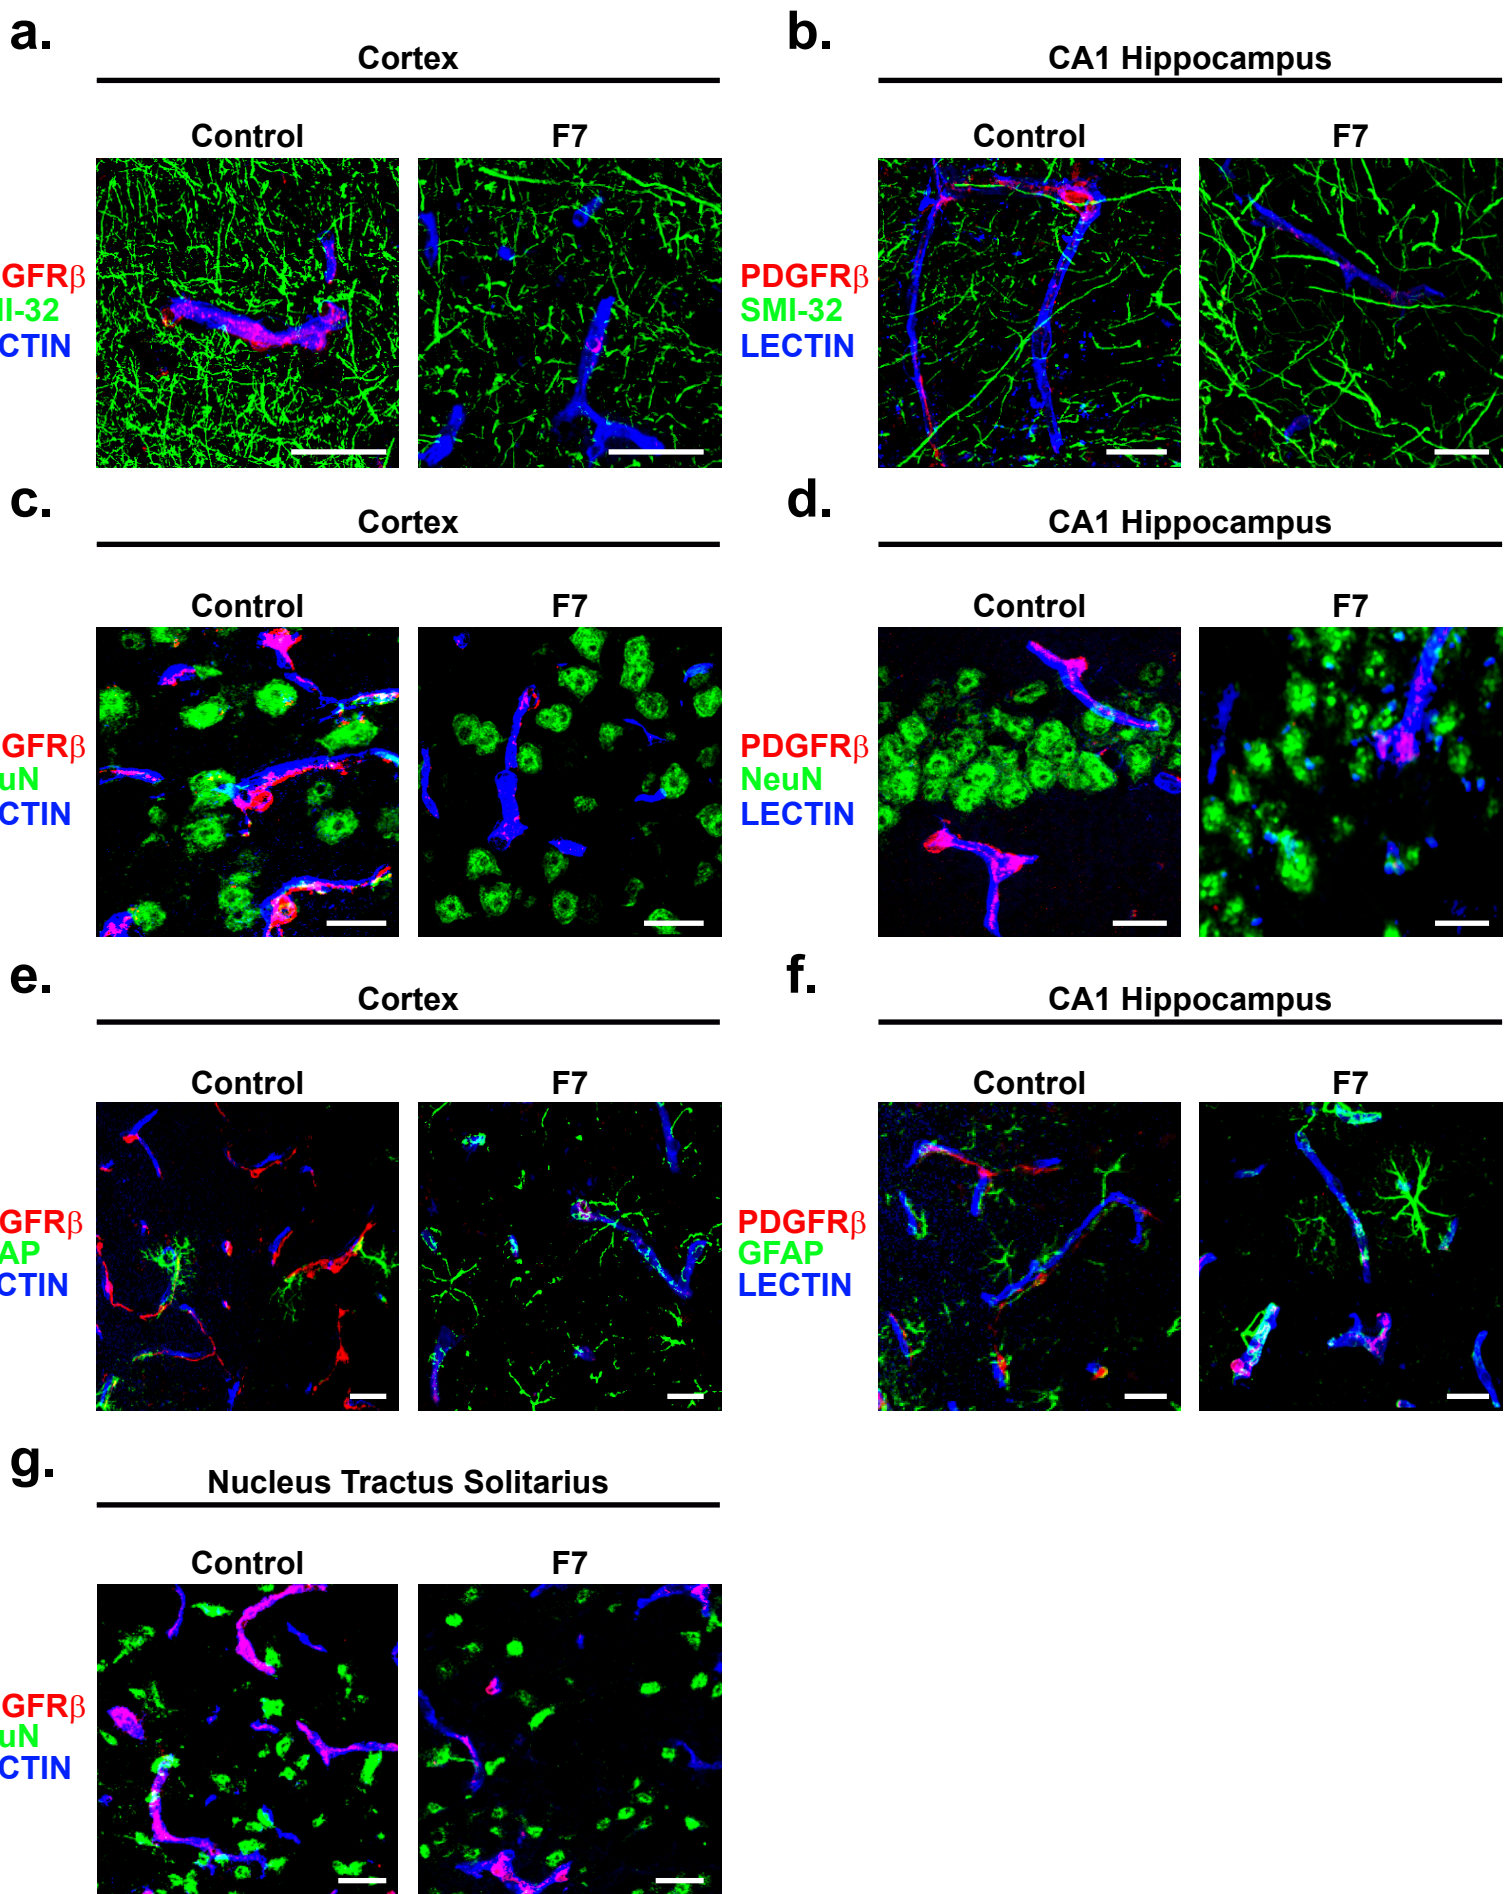

Supplement: MOESM2 [file 9643486]
